# Supplementary material for: Rif2 Promotes a Telomere Fold-Back Structure through Rpd3L Recruitment in Budding Yeast
Source: PLOS journal article supplement (doi:10.1371/journal.pgen.1002960), 2012-09-20
Supplement: S5 (10.1371/journal.pgen.1002960.s005) [file journal.pgen.1002960.s005]

**Table S1 – yeast strains used in this study**

Yeast strains used in this study were derived from BY4741 background (*his3-1, leu2-0, ura3-0, met1-0*)

| <b>Code</b> | <b>Name</b>          | <b>Genotype</b>                                                             |
|-------------|----------------------|-----------------------------------------------------------------------------|
| YHP88       | wild type con2       | <i>Mata gal80::NAT 7L::Con2-URA3</i>                                        |
| YHP77       | rif1 con2            | <i>Mata rif1::KAN gal80::NAT 7L::Con2-URA3</i>                              |
| YHP81       | rif2 con2            | <i>Mata rif2::KAN gal80::NAT 7L::Con2-URA3</i>                              |
| YHP241      | cdc13 exo1 con2      | <i>Mata cdc13::KAN exo1::HIS gal80::NAT 7L::Con2-URA3</i>                   |
| YHP251      | exo1 con2            | <i>Mata exo1::HIS gal80::NAT 7L::Con2-URA3</i>                              |
| YHP252      | stn1 exo1 con2       | <i>Mata stn1::KAN exo1::HIS3 gal80::NAT 7L::Con2-URA3</i>                   |
| YHP121      | wild type con4       | <i>Mata gal80::NAT 7L::Con4-URA3</i>                                        |
| YHP123      | rif1 con4            | <i>Mata gal80::NAT rif1::KAN 7L::Con4-URA3</i>                              |
| YHP125      | rif2 con4            | <i>Mata gal80::NAT rif2::KAN 7L::Con4-URA3</i>                              |
| YHP225      | rif2                 | <i>Mata rif2::KAN</i>                                                       |
| YHP224      | sir4                 | <i>Mata sir4::HIS</i>                                                       |
| YHP230      | sir4 rif2            | <i>Mata sir4::HIS rif2::KAN</i>                                             |
| YHP74       | wild type con1A      | <i>Mata gal80::NAT 7L::Con1A-URA3</i>                                       |
| YHP66       | rif1 con1A           | <i>Mata rif1::KAN gal80::NAT 7L::Con1A-URA3</i>                             |
| YHP71       | rif2 con1A           | <i>Mata rif2::KAN gal80::NAT 7L::Con1A-URA3</i>                             |
| YHP155      | rif1 rif2 con1A      | <i>Mata rif1::KAN rif2::HIS3 gal80::NAT 7L::Con1A-URA3</i>                  |
| YHP157      | rif1 rif2 con2       | <i>Mata rif1::KAN rif2::HIS3 gal80::NAT 7L::Con2-URA3</i>                   |
| YHP297      | rif2 est2 con2       | <i>Mata rif2::KAN est2::HIS3 gal80::NAT 7L::Con2-URA3</i>                   |
| YHP305      | cdc13 exo1 est2 con2 | <i>Mata cdc13::cdc13-1KAN exo1::HIS3 est2::HYG gal80::NAT 7L::Con2-URA3</i> |
| YHP302      | stn1 exo1 est2 con2  | <i>Mata stn1::stn1-13KAN exo1::HIS3 est2::HYG gal80::NAT 7L::Con2-URA3</i>  |
| YHP273      | stn1 exo1 rif2 con2  | <i>Mata stn1::stn1-13KAN exo1::HIS3 rif2::KAN gal80::NAT 7L::Con2-URA3</i>  |
| YHP275      | cdc13 exo1 rif2 con2 | <i>Mata cdc13::cdc13-1KAN exo1::HIS3 rif2::KAN gal80::NAT 7L::Con2-URA3</i> |
| YHP299      | est2 con2            | <i>Mata est2::HYG gal80::NAT 7L::Con2-URA3</i>                              |
| YMD527      | rxt2                 | <i>Mata rxt2::KAN</i>                                                       |
| YMD30       | sap30                | <i>Mata sap30::KAN</i>                                                      |
| YMD533      | rpd3                 | <i>Mata rpd3::KAN</i>                                                       |

|         |                         |                                                                              |
|---------|-------------------------|------------------------------------------------------------------------------|
| YMD195  | sin3                    | <i>Mata sin3::KAN</i>                                                        |
| YMD132  | eaf3                    | <i>Mata eaf3::KAN</i>                                                        |
| YMD186  | rcol                    | <i>Mata rcol::KAN</i>                                                        |
| YHP313  | Rxt2-TAP                | <i>Mata rxt2::RXT2-TAP</i> marked with HIS                                   |
| YHP315  | Rxt2-TAP rif2           | <i>Mata rxt2::RXT2-TAP</i> marked with HIS <i>rif2::KAN</i>                  |
| YJK56   | sin3                    | <i>Mata sin3::NAT</i>                                                        |
| YJK55   | cdc13-1                 | <i>Mata cdc13::cdc13-1KAN</i>                                                |
| YJK57   | cdc13-1 sin3            | <i>Mata cdc13::cdc13-1KAN sin3::NAT</i>                                      |
| YBL725  | tel2-7 con2             | <i>Mata tel2::tel2-7KAN gal80::NAT 7L::Con2-URA3</i>                         |
| YBL727  | stn1-13 con2            | <i>Mata stn1::stn1-13KAN gal80::NAT 7L::Con2-URA3</i>                        |
| YBL729  | cdc13-1 con2            | <i>Mata cdc13::cdc13-1KAN gal80::NAT 7L::Con2-URA3</i>                       |
| YBL721  | rap1-1 con2             | <i>Mata rap1::rap1-1KAN gal80::NAT 7L::Con2-URA3</i>                         |
| YBL723  | rap1-2 con2             | <i>Mata rap1::rap1-2KAN gal80::NAT 7L::Con2-URA3</i>                         |
| YHP266  | cdc13-1 exo1 con1A      | <i>Mata cdc13::cdc13-1KAN exo1::HIS3 gal80::NAT 7L::Con1A-URA3</i>           |
| YHP260  | stn1-13 exo1 con1A      | <i>Mata stn1::stn1-13KAN exo1::HIS3 gal80::NAT 7L::Con1A-URA3</i>            |
| YHP214  | rif1 est2 con1A         | <i>Mata rif1::KAN est2::HIS3 gal80::NAT 7L::Con1A-URA3</i>                   |
| YHP215  | rif2 est2 con1A         | <i>Mata rif2::KAN est2::HIS3 gal80::NAT 7L::Con1A-URA3</i>                   |
| YHP307  | cdc13-1 exo1 est2 con1A | <i>Mata cdc13::cdc13-1KAN exo1::HIS3 est2::HYG gal80::NAT 7L::Con1A-URA3</i> |
| YHP303  | stn1-13 exo1 est2 con1A | <i>Mata stn1::stn1-13KAN exo1::HIS3 est2::HYG gal80::NAT 7L::Con1A-URA3</i>  |
| YHP296  | rif1 est2 con2          | <i>Mata rif1::KAN est2::HIS3 gal80::NAT 7L::Con2-URA3</i>                    |
| YMD923  | wild type con4          | <i>Mata gal80::NAT 7L::Con4-URA3</i>                                         |
| YMD924  | rxt2 con4               | <i>Mata rxt2::KAN gal80::NAT 7L::Con4-URA3</i>                               |
| YMD925  | sds3 con4               | <i>Mata sds3::KAN gal80::NAT 7L::Con4-URA3</i>                               |
| YMD926  | pho23 con4              | <i>Mata pho23::KAN gal80::NAT 7L::Con4-URA3</i>                              |
| YMP927  | sap30 con4              | <i>Mata sap30::KAN gal80::NAT 7L::Con4-URA3</i>                              |
| YMD928  | sin3 con4               | <i>Mata sin3::KAN gal80::NAT 7L::Con4-URA3</i>                               |
| YMD929  | rcol con4               | <i>Mata rcol::KAN gal80::NAT 7L::Con4-URA3</i>                               |
| YMD930  | eaf1 con4               | <i>Mata eaf1::KAN gal80::NAT 7L::Con4-URA3</i>                               |
| YMD1022 | hda1 con4               | <i>Mata hda1::KAN gal80::NAT 7L::Con4-URA3</i>                               |
| YMD1026 | hda2 con4               | <i>Mata hda2::KAN gal80::NAT 7L::Con4-URA3</i>                               |
| YMD1030 | hda3 con4               | <i>Mata hda3::KAN gal80::NAT 7L::Con4-URA3</i>                               |
| YMD10   | hda1                    | <i>Mata hda1::KAN</i>                                                        |

|         |                            |                                                                     |
|---------|----------------------------|---------------------------------------------------------------------|
| YMD203  | <i>hda2</i>                | Mata <i>hda2::KAN</i>                                               |
| YMD181  | <i>hda3</i>                | Mata <i>hda3::KAN</i>                                               |
| YMD967  | <i>rxt2 con2</i>           | Mata <i>rxt2::KAN gal80::NAT 7L::Con2-URA3</i>                      |
| YMD969  | <i>rxt2 rif2 con2</i>      | Mata <i>rxt2::KAN rif2::HYG gal80::NAT 7L::Con2-URA3</i>            |
| YMD995  | <i>sap30 con2</i>          | Mata <i>sap30::KAN gal80::NAT 7L::Con2-URA3</i>                     |
| YMD997  | <i>sap30 rif2 con2</i>     | Mata <i>sap30::KAN rif2::HYG gal80::NAT 7L::Con2-URA3</i>           |
| YMD1164 | <i>rad52 est2</i>          | Mata <i>rad52::NAT est2::HIS3</i>                                   |
| YMD1169 | <i>rad52 est2 sin3</i>     | Mata <i>rad52::NAT est2::HIS3 sin3::KAN</i>                         |
| YMD975  | <i>sin3 con2</i>           | Mata <i>sin3::KAN gal80::NAT 7L::Con2-URA3</i>                      |
| YMD977  | <i>sin3 rif2 con2</i>      | Mata <i>sin3::KAN rif2::HYG gal80::NAT 7L::Con2-URA3</i>            |
| YMD960  | <i>rco1 con2</i>           | Mata <i>rco1::KAN gal80::NAT 7L::Con2-URA3</i>                      |
| YMD962  | <i>rco1 rif2 con2</i>      | Mata <i>rco1::KAN rif2::HYG gal80::NAT 7L::Con2-URA3</i>            |
| YMD987  | <i>eaf3 con2</i>           | Mata <i>eaf3::KAN gal80::NAT 7L::Con2-URA3</i>                      |
| YMD989  | <i>eaf3 rif2 con2</i>      | Mata <i>eaf3::KAN rif2::HYG gal80::NAT 7L::Con2-URA3</i>            |
| YMD1110 | <i>hda1 con2</i>           | Mata <i>hda1::KAN gal80::NAT 7L::Con2-URA3</i>                      |
| YMD1112 | <i>hda1 rif2 con2</i>      | Mata <i>hda1::KAN rif2::HYG gal80::NAT 7L::Con2-URA3</i>            |
| YMD1113 | <i>hda2 con2</i>           | Mata <i>hda2::KAN gal80::NAT 7L::Con2-URA3</i>                      |
| YMD1116 | <i>hda2 rif2 con2</i>      | Mata <i>hda2::KAN rif2::HYG gal80::NAT 7L::Con2-URA3</i>            |
| YMD1131 | <i>rxt2 eaf3 con2</i>      | Mata <i>eaf3::KAN rxt2::HIS3 gal80::NAT 7L::Con2-URA3</i>           |
| YMD1133 | <i>rxt2 eaf3 rif2 con2</i> | Mata <i>eaf3::KAN rxt2::HIS3 rif2::HYG gal80::NAT 7L::Con2-URA3</i> |
| YMD911  | <i>sds3 con2</i>           | Mata <i>sds3::KAN gal80::NAT 7L::Con2-URA3</i>                      |
| YMD291  | <i>sap30 con2</i>          | Mata <i>sap30::KAN gal80::NAT 7L::Con2-URA3</i>                     |
| YMD241  | <i>hda3 con2</i>           | Mata <i>hda3::KAN gal80::NAT 7L::Con2-URA3</i>                      |
| YMD299  | <i>pho23 con2</i>          | Mata <i>pho23::KAN gal80::NAT 7L::Con2-URA3</i>                     |
| YMD415  | <i>YHL029C con2</i>        | Mata <i>YHL029C::KAN gal80::NAT 7L::Con2-URA3</i>                   |
| YMD281  | <i>YBR103W con2</i>        | Mata <i>YBR103W::KAN gal80::NAT 7L::Con2-URA3</i>                   |
| YMD255  | <i>YBR275C con2</i>        | Mata <i>YBR275C::KAN gal80::NAT 7L::Con2-URA3</i>                   |
| YMD253  | <i>YPR070W con2</i>        | Mata <i>YPR070W::KAN gal80::NAT 7L::Con2-URA3</i>                   |
| YMD251  | <i>YML035C con2</i>        | Mata <i>YML035C::KAN gal80::NAT 7L::Con2-URA3</i>                   |
| YHP415  | <i>Cdc13-TAP</i>           | Mata <i>Cdc13-TAP marked with HIS3</i>                              |
| YHP417  | <i>Cdc13-TAP sin3</i>      | Mata <i>Cdc13-TAP marked with HIS3 sin3::KAN</i>                    |
| YMD78   | <i>rif1</i>                | Mata <i>rif1::KAN</i>                                               |
| YHP314  | <i>Rco1-TAP</i>            | Mata <i>Rco1-TAP marked with HIS3</i>                               |

|         |                   |                                                                          |
|---------|-------------------|--------------------------------------------------------------------------|
| YHP319  | Rco1-TAP rif2     | <i>Mata<math>\alpha</math> Rco1-TAP marked with HIS3 rif2::KAN</i>       |
| YHP326  | cdc13-1 sin3 exo1 | <i>Mata cdc13-1::KAN sin3::NAT exo1::HIS3</i>                            |
| YBL259  | Rap1-TAP          | <i>Mata Rap1-TAP marked with HIS3</i>                                    |
| YHP373  | rad52             | <i>Mata rad52::NAT</i>                                                   |
| YMD1146 | rad52 sin3 est2   | <i>Mata/Mata<math>\alpha</math> Het. rad52::NAT sin3::KAN est2::HIS3</i> |
| YHP379  | rad52 sin3        | <i>Mata rad52::NAT sin3::KAN</i>                                         |
